# Supplementary material for: Sustained Exposure of Substance P Causes Tendinopathy
Source: MDPI journal article supplement (doi:10.3390/ijms21228633), 2020-11-16
Supplement: s1 [file s1]

# Supplementary data.

Supplementary Table S1. Movin score

| Variables                                 | Grade                    |                         |                                                |                         |
|-------------------------------------------|--------------------------|-------------------------|------------------------------------------------|-------------------------|
|                                           | 1 (Normal)               | 2 (Slightly abnormal)   | 3 (Abnormal)                                   | 4 (Markedly abnormal)   |
| <b>Fiber structure</b>                    | Continue, long fiber     | Slightly fragmented     | Moderately fragmented                          | Severely fragmented     |
| <b>Fiber arrangement</b>                  | Compacted and parallel   | Slightly loose and wavy | Moderately loose, wavy and cross to each other | No identifiable pattern |
| <b>Rounding of the nuclei</b>             | Long spindle shape cells | Slightly rounding       | Moderately rounding                            | Severely rounding       |
| <b>Regional variations in cellularity</b> | Normal pattern           | Slightly increase       | Moderately increase                            | Severely increase       |
| <b>Increased vascularity</b>              | < 10%                    | 10 - 20%                | 20 - 30%                                       | > 30%                   |
| <b>Decreased collagen stainability</b>    | < 10%                    | 10 - 20%                | 20 - 30%                                       | > 30%                   |
| <b>Hyalinization</b>                      | < 10%                    | 10 - 20%                | 20 - 30%                                       | > 30%                   |
| <b>Glycosaminoglycan content</b>          | < 10%                    | 10 - 20%                | 20 - 30%                                       | > 30%                   |
